# Supplementary material for: Cannabinoid consumption among cancer patients receiving systemic anti-cancer treatment in the Netherlands
Source: Springer Nature journal article supplement (doi:10.1007/s00432-022-04085-z), 2022-07-02
Supplement: MOESM2 [file 432_2022_4085_MOESM2_ESM.pdf]

## Interview / enquête Cannabis gebruik bij patiënten met kanker (versie nov 2020)

Patiëntcode:

### ALGEMEEN

1. Geslacht
  - Man
  - Vrouw
2. Leeftijd:
3. Hoogst genoten opleidingsniveau
  - Basisschool
  - Middelbare school
  - MBO
  - HBO
  - Academisch
  - Post-academisch
4. Etnische achtergrond:
5. Diagnose maligniteit:
  - Mamma
  - Gastro-intestinaal (GE)
  - Urogenitaal
  - Pulmonaal
  - Sarcoom
  - Melanoom
  - Gynaecologisch
  - Hoofd/hals
  - Anders, namelijk:
6. Behandelintentie:
  - Curatief
  - Palliatief
7. Behandeling:
  - a.  Chemotherapie     Immunotherapie     Targeted therapy, namelijk:
  - b.  Adjuvant     Neo-adjuvant     1<sup>e</sup> lijn     2<sup>e</sup> lijn     ≥ 3<sup>e</sup> lijn
8. Comorbiditeit:
  - Diabetes Mellitus
  - Pulmonaal
  - Cardiovasculair
  - Psychiatrisch
  - Anders, namelijk:



12. Overweegt u een cannabis product te gaan gebruiken?

- Ja ga naar vraag 12.  
 Nee deze enquête / interview is niet op u van toepassing

13. Hoe heeft u van cannabis producten gehoord?

- Via vrienden / kennissen / familie  
 Via internet  
 Via lotgenoten  
 Via mijn arts / verpleegkundige  
 Anders, namelijk:

14. Welke soort cannabis product overweegt u te gaan gebruiken?

- CBD olie .....%  
 CBD/THC olie ..... / ..... %  
 THC olie .....%  
 Cannabis thee CBD.....% / .....THC.....%  
 Cannabis roken / vernevelen CBD.....% / .....THC.....%  
 Weet ik niet  
 Anders, namelijk:

15. Waar wil u het cannabis product aanschaffen?

- Bij drogisterij of apotheek zonder recept  
 Via coffee shop  
 Via vrienden/familie  
 Eigen kweek  
 Op recept via arts  
 Via internet  
 Weet ik nog niet  
 Anders, namelijk:

16. Voor welke klachten / ziekten overweegt u een cannabis product te gaan gebruiken?  
(meerdere antwoorden mogelijk)

- ADHD  
 Pijn  
 Zenuwpijn  
 Spasmen  
 Angst  
 Depressie  
 Stress  
 Eetlust  
 Misselijkheid  
 Overgeven

Sectie: NOOIT gebruikt

- Slapeloosheid/slaapstoornis
- Tics
- Verhoogde oogdruk (glaucoom)
- HIV/aids
- Kanker (genezend)
- Multiple sclerose (genezend)
- Anders, namelijk:

**Einde enquête**

Sectie: Recreatief gebruik in verleden

17. Overweegt u nu of in de nabije toekomst een cannabis product te gaan gebruiken voor medicinale doeleinden?

Ja

ga naar vraag 17.

Nee

deze enquête / interview is niet op u van toepassing

18. Voor welke klachten / ziekten overweegt u een cannabis product te gaan gebruiken?  
(meerdere antwoorden mogelijk)

ADHD

Pijn

Zenuwpijn

Spasmen

Angst

Depressie

Stress

Eetlust

Misselijkheid

Overgeven

Slapeloosheid/slaapstoornis

Tics

Verhoogde oogdruk (glaucoom)

HIV/aids

Kanker (genezend)

Multiple sclerose (genezend)

Anders, namelijk:

19. Hoe heeft u van cannabis producten voor medicinale toepassingen gehoord?

Via vrienden / kennissen / familie

Via internet

Via lotgenoten

Via mijn arts / verpleegkundige

Anders, namelijk:

20. Welk soort cannabis product overweegt u te gaan gebruiken?

CBD olie .....%

CBD/THC olie ..... / ..... %

THC olie .....%

Cannabis thee CBD.....% / .....THC.....%

Cannabis roken / vernevelen CBD.....% / .....THC.....%

Weet ik niet

Anders, namelijk:

Sectie: Recreatief gebruik in verleden

21. Waar wil u het cannabis product aanschaffen?

- Bij drogisterij of apotheek zonder recept
- Via coffee shop
- Via vrienden/familie
- Eigen kweek
- Op recept via arts
- Via internet
- Weet ik nog niet
- Anders, namelijk:

**Einde Enquête**

22. Voor welke indicatie gebruikte u een cannabis product? (*Meerdere antwoorden mogelijk*)

Geef het door u ervaren effect een score 1-4 (1= geen effect; 4= maximaal effect)

- ADHD
- Pijn
- Zenuwpijn
- Spasmen
- Angst
- Depressie
- Stress
- Eetlust
- Misselijkheid
- Overgeven
- Slapeloosheid/slaapstoornis
- Tics
- Verhoogde oogdruk (glaucoom)
- HIV/aids
- Kanker (genezend)
- Multiple sclerose (genezend)
- Anders, namelijk:

23. Welk soort cannabis product gebruikte u?

- CBD olie .....%
- CBD/THC olie ..... / ..... %
- THC olie .....%
- Cannabis thee CBD.....% / .....THC.....%
- Cannabis roken / vernevelen CBD.....% / .....THC.....%
- Weet ik niet
- Anders, namelijk:

24. Hoe lang heeft u een cannabis product gebruikt?

.....maanden/jaren (doorhalen wat niet van toepassing is)

25. Waarom bent u gestopt met het gebruik van het cannabis product? (*meerdere antwoorden mogelijk*)

- Geen werking
- Te veel bijwerkingen
- Te duur
- Mijn arts raadde het af
- Anders, namelijk:

**Einde enquête**

Sectie: Huidig recreatief gebruik

26. Welk soort cannabis product gebruikt u?

- CBD olie .....%
- CBD/THC olie ..... / ..... %
- THC olie .....%
- Cannabis thee CBD.....% / .....THC.....%
- Cannabis roken / vernevelen CBD.....% / .....THC.....%
- Weet ik niet
- Anders, namelijk:

27. Hoe lang gebruikt u reeds een cannabis product?

.....maanden/jaren (doorhalen wat niet van toepassing is)

28. Hoe vaak gebruikt u het cannabis product?

- < 1x / week
- 1 – 5x/ week
- Dagelijks
- Meerdere malen per dag :..... keer
- Zeg ik liever niet

29. Hoeveel van het cannabis product gebruikt u per keer?

- Aantal druppels:
- Aantal joints:
- Anders, namelijk:
- Zeg ik liever niet

30. Waar haalt u uw cannabis product?

- Bij drogisterij of apotheek zonder recept
- Via coffee shop
- Via vrienden/familie
- Eigen kweek
- Op recept via arts
- Via internet
- Weet ik nog niet
- Anders, namelijk:

Sectie: Huidig recreatief gebruik

31. Heeft het gebruik van het cannabis product ook effecten op klachten als gevolg van de kanker?

Geef het door u ervaren effect een score 1-4 (1= geen effect; 4= maximaal effect)

| <b>Klacht</b> |  | <b>Niet van toepassing / weet niet</b> |
|---------------|--|----------------------------------------|
| Pijn          |  |                                        |
| Zenuwpijn     |  |                                        |
| Misselijkheid |  |                                        |
| Overgeven     |  |                                        |
| Jeuk          |  |                                        |
| Eetlust       |  |                                        |
| Vermoeidheid  |  |                                        |
| Gewicht       |  |                                        |
| Depressie     |  |                                        |
| Angst         |  |                                        |
| Stress        |  |                                        |
| Slapeloosheid |  |                                        |

32. Indien het cannabis product helpt voor een van eerder genoemde klachten: hoe snel werkt het?

.....minuten

niet van toepassing

33. Indien het cannabis product helpt voor een van eerder genoemde klachten: hoe lang werkt het?

.....minuten

niet van toepassing

**Einde enquête**

Sectie: Huidig medicinaal gebruik

34. Welk soort cannabis product gebruikt u?

- CBD olie .....%
- CBD/THC olie ..... / ..... %
- THC olie .....%
- Cannabis thee CBD.....% / .....THC.....%
- Cannabis roken / vernevelen CBD.....% / .....THC.....%
- Weet ik niet
- Anders, namelijk:

35. Hoe lang gebruikt u reeds een cannabis product?

.....maanden/jaren (doorhalen wat niet van toepassing is)

36. Hoe vaak gebruikt u het cannabis product?

- < 1x / week
- 1 – 5x/ week
- Dagelijks
- Meerdere malen per dag :..... keer
- Zeg ik liever niet

37. Hoeveel van het cannabis product gebruikt u per keer?

- Aantal druppels:
- Aantal joints:
- Anders, namelijk:
- Zeg ik liever niet

38. Waar haalt u uw cannabis product?

- Bij drogisterij of apotheek zonder recept
- Via coffee shop
- Via vrienden/familie
- Eigen kweek
- Op recept via arts
- Via internet
- Weet ik nog niet
- Anders, namelijk:

39. Waar gebruikt u het cannabis product voor?

- a. Als anti-kanker medicijn ja / nee
- b. Tegen lichamelijke klachten ja / nee
- c. Tegen psychische klachten ja / nee
