# Supplementary material for: Cannabinoid consumption among cancer patients receiving systemic anti-cancer treatment in the Netherlands
Source: J Cancer Res Clin Oncol. 2022 Jul 2;149(5):1863–72. doi: 10.1007/s00432-022-04085-z (PMC10097765; doi:10.1007/s00432-022-04085-z)
Supplement: Supplementary file 1 — Supplementary file1 (DOCX 22 KB) [file 432_2022_4085_MOESM1_ESM.docx]

**Cannabinoid consumption among cancer patients receiving systemic anti-cancer treatment in the Netherlands**

Y. Oelen1, S. Revenberg1, J. de Vos-Geelen1, R. van Geel2,3, J. Schoenmaekers3,4, M. van den Beuken-Everdingen4, L.B.J. Valkenburg-van Iersel1

Affiliations of authors:

1 Division of Medical Oncology, Department of Internal Medicine, GROW-School for Oncology and Developmental Biology, Maastricht University Medical Center, Maastricht, the Netherlands.

2 Department of Clinical Pharmacy and Toxicology, Maastricht University Medical Center+, Maastricht, the Netherlands

3 CARIM School for Cardiovascular Disease, Maastricht University, Maastricht, the Netherlands

4 Centre of Expertise for Palliative Care, Maastricht University Medical Centre (MUMC+), Maastricht, the Netherlands

**Journal:** Journal of Cancer Research and Clinical Oncology

**e-mail address:** yrina.oelen@mumc.nl

**APPENDIX 1 – Reported symptoms for consumption among separated for previous and current users with medical intent**

**Fig. 3** Reported reasons for use of cannabinoids with medical intention, among previous users. Represented in absolute values.

**Fig. 4** Reported reasons for use of cannabinoids with medical intention, among current users. Represented in absolute values
